# Supplementary material for: COVID-19: what is not being addressed
Source: PubMed Central journal article supplement (PMC7554414; doi:10.1177/0956247820963961), 2021-04
Supplement: gupte-mitlin-supplement.pdf [file gupte-mitlin-supplement.pdf]

## COVID-19: what is not being addressed

### Online supplementary information

Underlying data for Tables 1 and 2

| Title                                                                                                        | Author(s)/publication                  | Date of publication | Type [blog/opinion – institutional; blog – personal; news/media; magazine; institutional grey literature] | Primary focus [countries and/or cities] | Early/direct health impacts | Secondary/ societal impacts | State response | Civil society response | Cited in which footnote? |
|--------------------------------------------------------------------------------------------------------------|----------------------------------------|---------------------|-----------------------------------------------------------------------------------------------------------|-----------------------------------------|-----------------------------|-----------------------------|----------------|------------------------|--------------------------|
| <b>Asia</b>                                                                                                  |                                        |                     |                                                                                                           |                                         |                             |                             |                |                        |                          |
| How Does Covid-19 Affect Urban Slums? Evidence from Settlement Leaders in India                              | Auerbach, A and T Thachil              | n.d.                | Institutional grey literature                                                                             | India, Bhopal, Jaipur                   |                             |                             |                | •                      | 30, 31                   |
| <a href="#">Ground Report: Chaos at Anand Vihar as Buses Prepare to Take Migrant Workers Home</a>            | Ashirwad Mahaprashasta, A and A Srivas | 28-Mar-20           | News/media                                                                                                | India, Delhi                            |                             | •                           |                |                        | 40                       |
| <a href="#">Mumbai Kabrastan distributing food supplies at Dharavi</a>                                       | Mumbai Mirror                          | 06-Apr-20           | News/media                                                                                                | India, Mumbai                           |                             |                             |                | •                      | 41                       |
| <a href="#">COVID-19 tech will expand surveillance state in China</a>                                        | Emerald Insight                        | 15-Apr-20           | Blog/opinion – institutional                                                                              | China                                   |                             | •                           | •              |                        | 11                       |
| <a href="#">Blame It on COVID-19: Domestic Violence on The Rise, Are Men Putting More Pressure on Women?</a> | Deb Roy, L                             | 20-Apr-20           | News/media                                                                                                | India                                   |                             | •                           |                |                        | 80                       |
| <a href="#">Covid-19 and the Hrishipara Diarists: was April the cruellest month?</a>                         | Global Development Institute           | 11-May-20           | Blog/opinion – institutional                                                                              | Bangladesh                              |                             | •                           |                |                        | 70                       |
| <a href="#">Responding to COVID-19 in a high-density low-income district in Mumbai</a>                       | Manivanan Devandra, S (Mahila Milan)   | 13-May-20           | Blog/opinion – institutional                                                                              | India, Mumbai                           |                             |                             |                | •                      | 29                       |
| <a href="#">India made its contact tracing app mandatory. Now people are angry</a>                           | Christopher, N                         | 14-May-20           | News/media                                                                                                | India                                   |                             | •                           | •              | •                      | 14                       |

|                                                                                                                                |                                                                                        |           |                               |                         |   |   |   |   |                |
|--------------------------------------------------------------------------------------------------------------------------------|----------------------------------------------------------------------------------------|-----------|-------------------------------|-------------------------|---|---|---|---|----------------|
| <a href="#">Community-led COVID-19 response: the work of the Philippines Homeless People's Federation</a>                      | Carampatana, T and R Tuazon (Homeless People's Federation of the Philippines – PACSII) | 09-Jun-20 | Blog/opinion – institutional  | Philippines             |   |   |   | • | 32             |
| <a href="#">India witnesses upsurge in Covid deaths</a>                                                                        | South Asia Monitor                                                                     | 22-Jun-20 | News/media                    | India                   | • |   |   |   | 7              |
| <a href="#">How Dhaka's urban poor are dealing with COVID-19</a>                                                               | Taylor, J                                                                              | 01-Jul-20 | Blog – personal               | Bangladesh              |   | • |   |   | 73             |
| <b>Africa</b>                                                                                                                  |                                                                                        |           |                               |                         |   |   |   |   |                |
| <a href="#">Corona Diaries of the Urban Poor</a>                                                                               | JEI                                                                                    | n.d.      | Institutional grey literature | Pan-Africa              |   | • |   | • | 65, 66, 69, 70 |
| <a href="#">Covid-19; Reflections from Mukuru's Community Health Volunteers (CHVs)</a>                                         | Adobe Spark                                                                            | n.d.      | News/media                    | Pan-Africa              |   |   |   | • | 19             |
| <a href="#">Impact of Covid19 on Lagos Informal Settlements &amp; Vulnerable Urban Poor Populations: Report on Findings</a>    | PCEI, NSIFF, JEI                                                                       | n.d.      | Institutional grey literature | Nigeria                 |   | • | • | • | 68             |
| <a href="#">Know Your City TV, COVID-19</a>                                                                                    | Muongano Alliance                                                                      | n.d.      | News/media                    | Kenya                   |   | • |   |   | 65             |
| <a href="#">Muungano wa Wanavijiji COVID-19 response</a>                                                                       | Muongano Alliance                                                                      | n.d.      | Institutional grey literature | Pan-Africa              |   | • |   | • | 65             |
| <a href="#">Regulations and Guidelines - Coronavirus COVID-19</a>                                                              | South African government                                                               | n.d.      | Institutional grey literature | South Africa            |   |   | • |   | 82             |
| <a href="#">29 areas in SA identified for de-densification to combat coronavirus</a>                                           | BusinessTech                                                                           | 25-Mar-20 | News/media                    | South Africa            | • |   | • |   | 4              |
| <a href="#">Covid-19: Civil society bodies warn against de-densification of informal settlements</a>                           | Ntseku, M                                                                              | 21-Apr-20 | News/media                    | South Africa, Cape Town |   | • |   |   | 52             |
| <a href="#">Zimbabwe faces malaria outbreak as it locks down to counter coronavirus</a>                                        | Chingono, N                                                                            | 21-Apr-20 | News/media                    | Zimbabwe                |   | • |   |   | 43             |
| <a href="#">Township lockdown: How South Africa's poor bear the cost of coronavirus</a>                                        | Oliver, G                                                                              | 23-Apr-20 | Blog/opinion – institutional  | South Africa, Cape Town |   | • |   |   | 67             |
| <a href="#">Aerial Footage Shows Miles-Long Queue for Food Aid in South Africa</a>                                             | Reuters                                                                                | 30-Apr-20 | News/media                    | South Africa, Pretoria  |   | • |   |   | 42             |
| <a href="#">At least 5,000 people in Nairobi were left homeless and at risk of contracting COVID-19 after slum demolitions</a> | Bhalla, N                                                                              | 06-May-20 | News/media                    | Nairobi                 |   | • |   |   | 17             |
| <a href="#">'I realised my body was burning': police brutality in Uganda lockdown</a>                                          | Hayden, S                                                                              | 28-May-20 | News/media                    | Uganda,                 |   | • |   |   | 79             |

|                                                                                                                                      |                           |           |                               |                      |   |   |   |   |            |
|--------------------------------------------------------------------------------------------------------------------------------------|---------------------------|-----------|-------------------------------|----------------------|---|---|---|---|------------|
| <a href="#">Just Empower</a>                                                                                                         | JEI                       | 30-May-20 | Institutional grey literature | pan-Africa           |   | • |   |   | 78         |
| <a href="#">27–28 May 2020: coronavirus situation tracker for Kenyan informal settlements</a>                                        | Muungano Alliance         | 30-May-20 | Blog/opinion – institutional  | Kenya                | • |   |   |   | 64         |
| <a href="#">Kenyan police ‘killed 15’ since start of coronavirus curfew</a>                                                          | Al Jazeera                | 06-Jun-20 | News/Media                    | Kenya                |   | • | • |   | 26         |
| <a href="#">Covid-19 isolation centers: Muungano Alliance contributes to government guidelines</a>                                   | Muungano Alliance         | 17-Jun-20 | Blog/opinion – institutional  | Kenya                |   |   |   | • | 45         |
| <a href="#">19–20 June 2020: coronavirus situation tracker for Kenyan informal settlements</a>                                       | Muungano Alliance         | 23-Jun-20 | Blog/opinion – institutional  | Kenya                | • |   |   |   | 57         |
| <a href="#">Fighting a cholera outbreak in the middle of a COVID-19 pandemic</a>                                                     | Taremwa, A                | 23-Jul-20 | Blog/opinion – institutional  | Uganda               |   | • |   | • | 43         |
| <b>Latin America and the Caribbean</b>                                                                                               |                           |           |                               |                      |   |   |   |   |            |
| <a href="#">Latin America’s Prison Gangs Draw Strength from the Pandemic</a>                                                         | Dudley, S                 | 05-May-20 | News/media                    | Brazil               |   | • |   |   | 76         |
| <a href="#">Coronavirus in the Daily Life of Favelas, Part 8: In São Paulo, Guaianases Confronts Advancing Pandemic</a>              | Veloso, L                 | 06-May-20 | News/media                    | São Paulo            |   | • |   |   | 69         |
| <a href="#">COVID-19 in Guayaquil: from global notoriety to family responses</a>                                                     | IIED                      | 20-May-20 | Blog/opinion – institutional  | Guayaquil            |   | • |   |   | 54         |
| <a href="#">Argentina cordons off virus-hit slum as critics decry ‘ghettoes for poor people’</a>                                     | Goñi, U                   | 27-May-20 | News/media                    | Argentina            |   | • |   |   | 77         |
| <a href="#">How are Peru’s street vendors facing COVID-19?</a>                                                                       | Ogando, A C and O Abizaid | 11-Jun-20 | Blog – personal               | Peru                 |   | • |   |   | 35, 38, 46 |
| <a href="#">Coronavirus surges in Latin America as deaths surpass 100,000</a>                                                        | Jorgic, D                 | 24-Jun-20 | News/media                    | Pan-Latin America    | • |   |   |   | 6          |
| <a href="#">Data Favela Study: 80% of Favela Families Are Living on Less than Half of Their Pre-Pandemic Income</a>                  | RioOnWatch                | 03-Jul-20 | Blog/opinion – institutional  | Rio de Janeiro       |   | • |   |   | 72         |
| <a href="#">Epidemiological Alert: Dengue in the context of COVID-19</a>                                                             | PAHO/WHO                  | 28-Jul-20 | Institutional grey literature | Pan-Latin America    |   | • | • |   | 43         |
| <b>Multi-country/multi-region</b>                                                                                                    |                           |           |                               |                      |   |   |   |   |            |
| <a href="#">Government responses to COVID-19 crisis</a>                                                                              | WIEGO                     | n.d.      | Institutional grey literature | Multi-country/region |   |   | • |   | 34         |
| <a href="#">Technical Considerations in Analysing &amp; Advocating for Cash Benefit Schemes for Informal Workers during COVID-19</a> | WIEGO                     | n.d.      | Institutional grey literature | Multi-country/region |   | • | • |   | 37         |
| <a href="#">World COVID-19 Stats</a>                                                                                                 | N/A                       | n.d.      | Institutional grey literature | Multi-country/region | • |   |   |   | 8          |

|                                                                                                                      |                                                     |           |                               |                      |   |   |  |   |        |
|----------------------------------------------------------------------------------------------------------------------|-----------------------------------------------------|-----------|-------------------------------|----------------------|---|---|--|---|--------|
| <a href="#">Outbreaks like coronavirus start in and spread from the edges of cities</a>                              | Keil, R, C Connolly and S Harris Ali                | 18-Feb-20 | Blog – personal               | Multi-country/region |   | • |  |   | 3      |
| <a href="#">Lockdowns around the world bring rise in domestic violence</a>                                           | Graham-Harrison, E, A Giuffrida, H Smith and L Ford | 28-Mar-20 | News/media                    | Multi-country/region |   | • |  |   | 80     |
| <a href="#">UN-Habitat COVID-19 Response Plan</a>                                                                    | UN-Habitat                                          | Apr-20    | Institutional grey literature | Multi-country/region |   | • |  | • | 1      |
| <a href="#">From Kenya to Bangladesh mask-making has become a thriving cottage industry</a>                          | Hodal, K                                            | 25-May-20 | News/media                    | Multi-country/region |   | • |  |   | 44     |
| <a href="#">Managing COVID-19 on an increasingly urbanised planet</a>                                                | Connolly, C                                         | 26-Jun-20 | Blog – personal               | Multi-country/region |   | • |  |   | 63     |
| <a href="#">Coronavirus tracked: the latest figures as countries reopen</a>                                          | Financial Times                                     | 12-Aug-20 | News/media                    | Multi-country/region | • |   |  |   | 48, 53 |
| <b>Others</b>                                                                                                        |                                                     |           |                               |                      |   |   |  |   |        |
| <a href="#">COVID-19: Resources to address gender-based violence risks</a>                                           | GBVguidelines.org                                   | n.d.      | Institutional grey literature | Other [N/A]          |   | • |  |   | 80     |
| <a href="#">Pandemics Are Also an Urban Planning Problem</a>                                                         | Klaus, I                                            | 07-Mar-20 | Blog/opinion – institutional  | Other                |   | • |  |   | 63     |
| <a href="#">Density Is New York City’s Big ‘Enemy’ in the Coronavirus Fight</a>                                      | Rosenthal, B                                        | 23-Mar-20 | News/media                    | Other [New York]     |   | • |  |   | 61     |
| <a href="#">The Digital Response to the Outbreak of COVID-19</a>                                                     | McDonald, S                                         | 30-Mar-20 | Blog/opinion – institutional  | Other [N/A]          |   | • |  |   | 10     |
| <a href="#">Germany Says It Has Identified the 1st Coronavirus Transmission in the Country</a>                       | Schmitz, R B                                        | 21-Apr-20 | News/media                    | Other [Germany]      | • |   |  |   | 2      |
| <a href="#">The COVID-19 crisis: income support to informal workers is necessary and possible</a>                    | Alfers, L, R Moussié and J Harvey                   | 22-Apr-20 | Blog – personal               | Other                |   | • |  | • | 37     |
| <a href="#">COVID-19: Exceptional measures should not be cover for human rights abuses and violations – Bachelet</a> | UNHRC                                               | 27-Apr-20 | Institutional grey literature | Other                |   | • |  |   | 74     |
| <a href="#">Sitting ducks: UK charity sees surge in calls from stalking victims</a>                                  | Batha, E                                            | 11-May-20 | Blog/opinion – institutional  | Other [UK]           |   | • |  |   | 80     |
| <a href="#">Scientists are drowning in COVID-19 papers. Can new tools keep them afloat?</a>                          | Brainard, J                                         | 13-May-20 | Blog personal                 | Other [N/A]          |   | • |  |   | 9      |
| <a href="#">Just Because You Can Afford to Leave the City Doesn’t Mean You Should</a>                                | Bassett, M T                                        | 15-May-20 | News/media                    | Other [New York]     |   | • |  |   | 49     |
| <a href="#">For World’s Street Vendors, Life May Never be the Same after COVID-19</a>                                | Balbuena, P and C Skinner                           | 07-Jun-20 | Blog – personal               | Other                |   | • |  |   | 39     |
| <a href="#">Emerging lessons from community-led COVID-19 responses in urban areas</a>                                | IIED                                                | 25-Jun-20 | Institutional grey literature | Other                |   | • |  | • | 47     |
